# Supplementary material for: Reconsidering N component of cancer staging for T1-2N0-2M0 small-cell lung cancer: a retrospective study based on multicenter cohort
Source: Springer Nature journal article supplement (doi:10.1186/s12931-023-02440-3), 2023-06-23
Supplement: MOESM1 [file 25530458]

**Supplementary figure 1: The X-tile software determined the optimal cutoff point of ELNs. ELNs: examined lymph nodes**

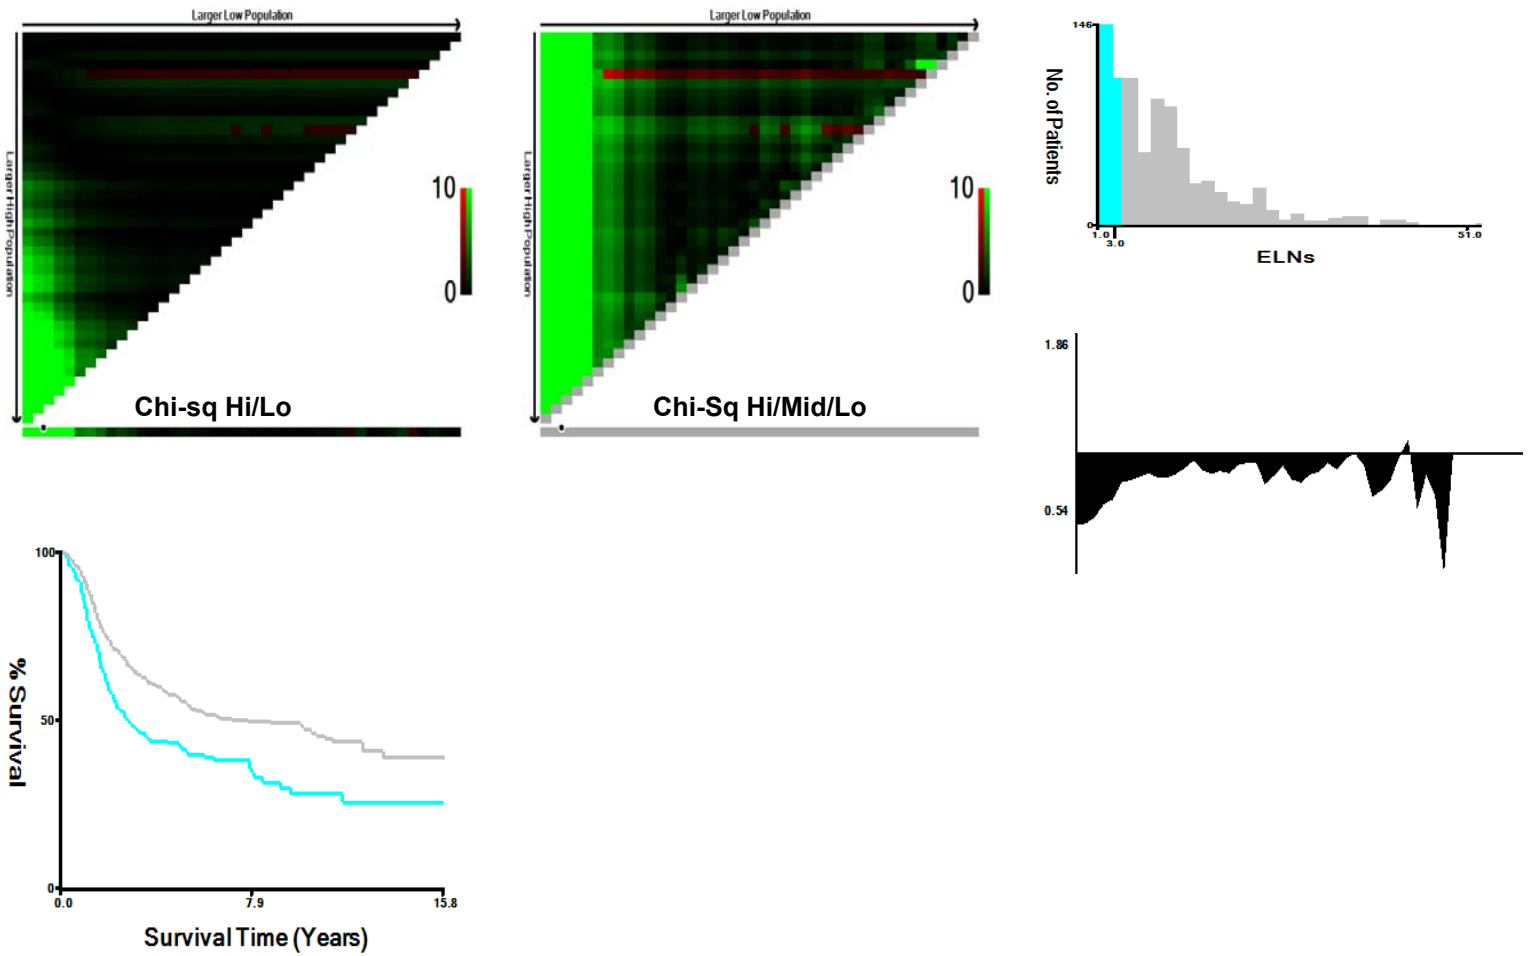

**Subpopulation Cutpoints:**

| <u>Pt No</u> | <u>% Total</u> | <u>Events</u> | <u>Rate</u> | <u>Rank</u> | <u>Range</u>    |
|--------------|----------------|---------------|-------------|-------------|-----------------|
| 195          | 22.97          | 114           | 58.46       | 0 to 2      | 1.00 thru 3.00  |
| 654          | 77.03          | 278           | 42.51       | 3 to 42     | 4.00 thru 51.00 |
| 849          | 100.00         | 392           | 46.17       | 0 to 42     | 1.00 thru 51.00 |

**Statistics:**

| <u>Variable</u>      | <u>Value</u> |              |
|----------------------|--------------|--------------|
| Miller-Seigmund P    | 0.0008       | Max: 0.0008  |
| Chi-sq Hi/Lo         | 18.0806      | Max: 18.0806 |
| Relative Risk 1 vs 2 | 1.38 / 1.00  |              |
