# Supplementary material for: Reconsidering N component of cancer staging for T1-2N0-2M0 small-cell lung cancer: a retrospective study based on multicenter cohort
Source: Springer Nature journal article supplement (doi:10.1186/s12931-023-02440-3), 2023-06-23
Supplement: MOESM2 [file 25530458]

**Supplementary figure 2: The X-tile software determined the optimal cutoff point of LNR. LNR: lymph node ratio**

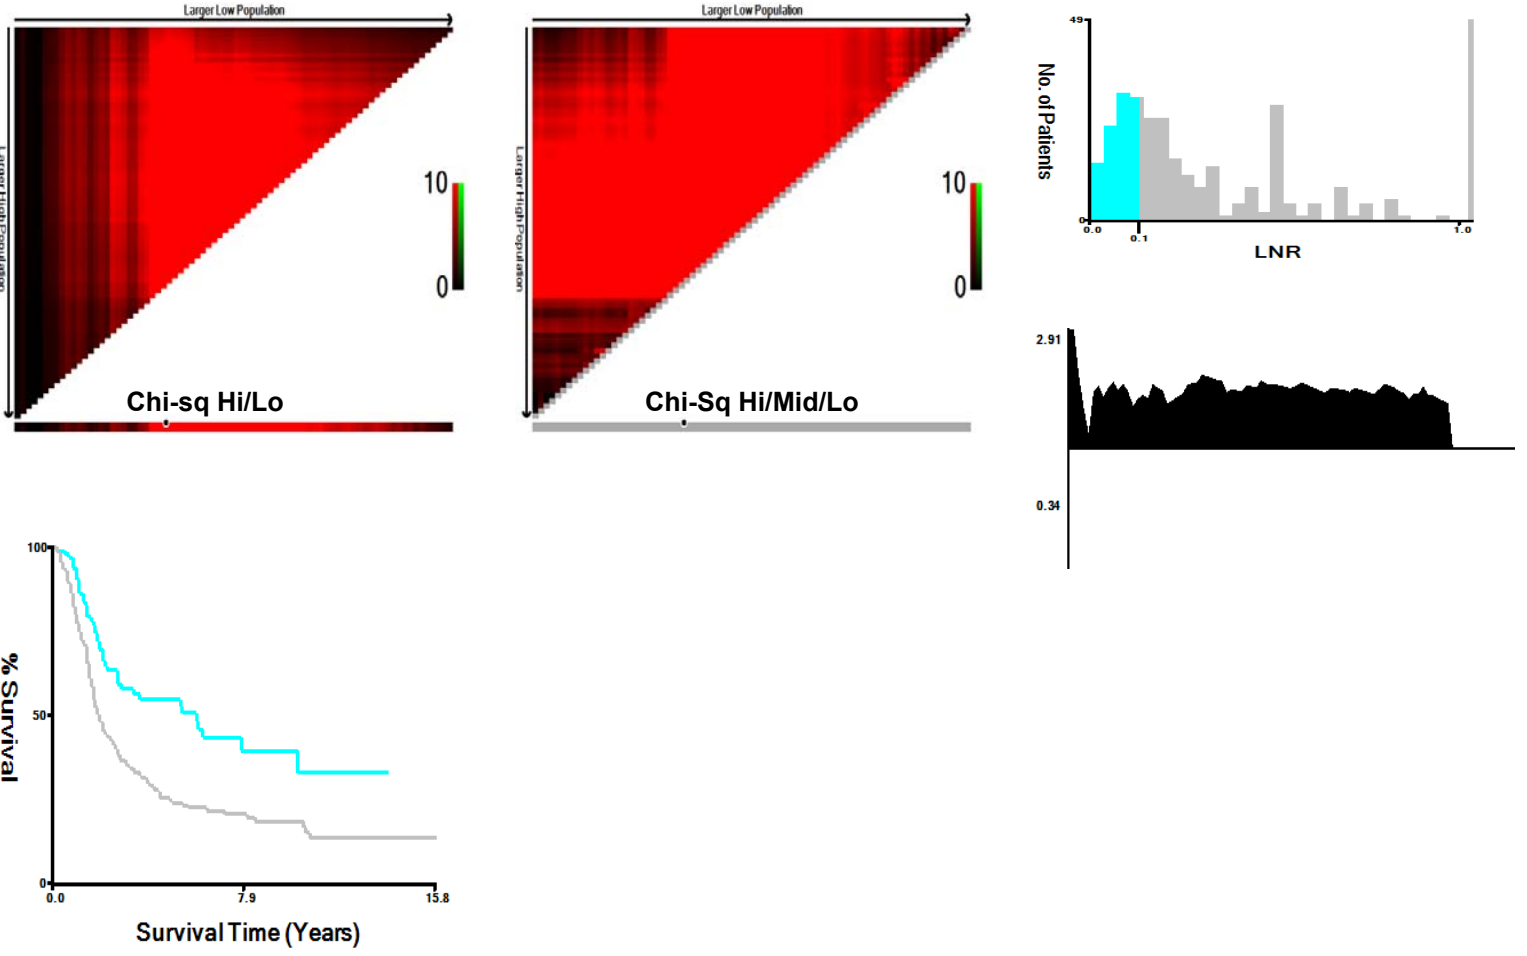

**Subpopulation Cutpoints:**

| Pt No | % Total | Events | Rate  | Rank     | Range          |
|-------|---------|--------|-------|----------|----------------|
| 95    | 30.06   | 45     | 47.37 | 0 to 27  | 0.02 thru 0.14 |
| 221   | 69.94   | 161    | 72.85 | 28 to 78 | 0.15 thru 1.00 |
| 316   | 100.00  | 206    | 65.19 | 0 to 78  | 0.02 thru 1.00 |

**Statistics:**

| Variable             | Value       |              |
|----------------------|-------------|--------------|
| Miller-Seigmund P    | 0.0019      | Max: 0.0019  |
| Chi-sq Hi/Lo         | 16.4216     | Max: 16.4216 |
| Relative Risk 1 vs 2 | 1.00 / 1.54 |              |
